# Supplementary material for: Optical Genome Mapping Reveals and Characterizes Recurrent Aberrations and New Fusion Genes in Adult ALL
Source: MDPI journal article supplement (doi:10.3390/genes14030686), 2023-03-09
Supplement: s1 [file s1]

## Supplementary document 2 information

### ALL-gene .bed file information

The .bed file contains genes associated with ALL and lymphoid malignancies (according to GMALL study group and Swerdlow et al., WHO Classification of Tumors of Hematopoietic and Lymphoid Tissues, *IARC*, 2022) and genes that are recurrently identified in ALL cases and considered potentially relevant for ALL according to current literature. The genomic position of the below mentioned genes was verified for hg19 gene transcripts using “Entrez Gene” by the National Library of Medicine (<https://www.ncbi.nlm.nih.gov/gene/>). The .bed file includes genes associated with B-ALL and T-ALL as well as breakpoint regions.

|   |           |           |        |
|---|-----------|-----------|--------|
| 1 | 164528421 | 164821068 | PBX1   |
| 1 | 47681962  | 47698007  | TAL1   |
| 1 | 87794563  | 87814606  | LMO4   |
| 1 | 47715811  | 47779819  | STIL   |
| 1 | 115247090 | 115259392 | NRAS   |
| 1 | 179068465 | 179198812 | ABL2   |
| 1 | 27022506  | 27108595  | ARID1A |
| 1 | 23884417  | 23885992  | ID3    |
| 1 | 65298912  | 65533429  | JAK1   |
| 1 | 156433519 | 156470567 | MEF2D  |
| 1 | 120454176 | 120612276 | NOTCH2 |
| 2 | 136871919 | 136875719 | CXCR4  |
| 2 | 198254508 | 198299817 | SF3B1  |
| 2 | 61704984  | 61765491  | XPO1   |
| 3 | 112182813 | 112218319 | BTLA   |
| 3 | 112051420 | 112081659 | CD200  |
| 3 | 38180152  | 38184513  | MYD88  |
| 4 | 153241696 | 153457244 | FBXW7  |
| 4 | 191005267 | 191007077 | DUX4   |
| 4 | 55095460  | 55164412  | PDGFRA |
| 4 | 106067032 | 106200960 | TET2   |
| 5 | 131396348 | 131398897 | IL3    |
| 5 | 158122928 | 158526924 | EBF1   |
| 5 | 142657496 | 142815077 | NR3C1  |
| 5 | 170736252 | 170739143 | TLX3   |
| 5 | 49432858  | 149492928 | CSF1R  |
| 5 | 35856993  | 35879705  | IL7R   |
| 5 | 149493402 | 149535408 | PDGFRB |
| 5 | 1253282   | 1295183   | TERT   |
| 6 | 93949738  | 94129277  | EPHA7  |
| 6 | 135502446 | 135540310 | MYB    |
| 6 | 44225903  | 44233288  | NFKBIE |
| 6 | 108188960 | 108279412 | SEC63  |

|    |           |           |                                         |
|----|-----------|-----------|-----------------------------------------|
| 6  | 138188396 | 138204449 | TNFAIP3                                 |
| 7  | 50344312  | 50472798  | IKZF1                                   |
| 7  | 141998851 | 143510972 | TRB locus                               |
| 7  | 38279625  | 38407656  | TRG locus                               |
| 7  | 27132614  | 27239710  | HOXA-gene-cluster                       |
| 7  | 140413128 | 140624729 | BRAF                                    |
| 7  | 2945776   | 3083501   | CARD11                                  |
| 7  | 148504475 | 148581383 | EZH2                                    |
| 7  | 124462440 | 124569879 | POT1                                    |
| 8  | 59717971  | 60031767  | TOX                                     |
| 8  | 42128820  | 42189978  | IKBKB                                   |
| 8  | 128748477 | 128755197 | MYC                                     |
| 8  | 27168995  | 27316908  | PTK2B                                   |
| 8  | 103264501 | 103424928 | UBR5                                    |
| 9  | 133710641 | 133763062 | ABL1                                    |
| 9  | 133531000 | 133730187 | breakpoint region BCR::ABL1             |
| 9  | 133589842 | 133710453 | most common breakpoint region BCR::ABL1 |
| 9  | 21967751  | 21975132  | CDKN2A p16INK4a                         |
| 9  | 21967751  | 21994490  | CDKN2A p14ARF                           |
| 9  | 22002902  | 22009304  | CDKN2B                                  |
| 9  | 36833266  | 37034265  | PAX5                                    |
| 9  | 108424738 | 108425403 | TAL2                                    |
| 9  | 139388885 | 139440500 | NOTCH1                                  |
| 9  | 4985245   | 5128183   | JAK2                                    |
| 9  | 134000973 | 134110050 | NUP214                                  |
| 10 | 102891057 | 102897546 | TLX1 (HOX11)                            |
| 10 | 21823101  | 22032559  | MLLT10                                  |
| 10 | 89623382  | 89731687  | PTEN                                    |
| 10 | 97948927  | 98031326  | BLNK                                    |
| 10 | 98353072  | 98480271  | PIK3AP1                                 |
| 10 | 111756131 | 111895323 | ADD3                                    |
| 10 | 64571756  | 64578927  | EGR2                                    |
| 11 | 118307207 | 118397547 | KMT2A                                   |
| 11 | 8245856   | 8285425   | LMO1 (RBTN1)                            |
| 11 | 33880123  | 33913623  | LMO2 (RBTN2)                            |
| 11 | 85668219  | 85780126  | PICALM                                  |
| 11 | 36531903  | 36601312  | RAG1                                    |
| 11 | 36613493  | 36619786  | RAG2                                    |
| 11 | 108093794 | 108239829 | ATM                                     |
| 11 | 102188215 | 102210134 | BIRC3                                   |
| 11 | 69455924  | 69469242  | CCND1/BCL1                              |
| 11 | 85955795  | 85989852  | EED                                     |
| 11 | 532242    | 535576    | HRAS                                    |
| 11 | 32409321  | 32457085  | WT1                                     |
| 12 | 11802608  | 12048311  | ETV6                                    |
| 12 | 6775643   | 6798738   | ZNF384                                  |

|    |           |           |                                    |
|----|-----------|-----------|------------------------------------|
| 12 | 25358180  | 25403863  | KRAS                               |
| 12 | 92534054  | 92539622  | BTG1                               |
| 12 | 112856751 | 112947722 | PTPN11                             |
| 13 | 48877883  | 49056026  | RB1                                |
| 13 | 28577411  | 28674713  | FLT3                               |
| 13 | 41129804  | 41240778  | FOXO1                              |
| 14 | 106053226 | 107288019 | IGH locus                          |
| 14 | 22090057  | 23021075  | TRA/D locus                        |
| 14 | 96176284  | 96180462  | TCL1                               |
| 14 | 103243786 | 103377837 | TRAF3                              |
| 15 | 34635516  | 34649936  | NUTM1                              |
| 15 | 90626277  | 90645700  | IDH2                               |
| 15 | 66679250  | 66783882  | MAP2K1                             |
| 15 | 88402982  | 88799970  | NTRK3                              |
| 16 | 3775055   | 3930714   | CREBBP                             |
| 16 | 81812896  | 81996290  | PLCG2                              |
| 17 | 7571720   | 7590868   | TP53                               |
| 17 | 62006100  | 62009691  | CD79B                              |
| 17 | 53342321  | 53402548  | HLF                                |
| 17 | 29421945  | 29704695  | NF1                                |
| 17 | 40465342  | 40540460  | STAT3                              |
| 17 | 40351195  | 40428409  | STAT5B                             |
| 17 | 30264026  | 30328057  | SUZ12                              |
| 18 | 52889416  | 53255423  | E2-2/TCF4 Deletion                 |
| 18 | 60790579  | 60987002  | BCL2                               |
| 18 | 52889416  | 53255423  | TCF4                               |
| 19 | 1609291   | 1652614   | TCF3                               |
| 19 | 13209847  | 13213672  | LYL1                               |
| 19 | 11487883  | 11494990  | EPOR                               |
| 19 | 17935591  | 17958791  | JAK3                               |
| 19 | 16435637  | 16439496  | KLF2                               |
| 19 | 35783064  | 35804710  | MAG                                |
| 19 | 19256376  | 19281072  | MEF2B                              |
| 19 | 6210392   | 6279986   | MLLT1                              |
| 19 | 1438395   | 1440494   | RPS15                              |
| 19 | 1609291   | 1652614   | TCF3                               |
| 19 | 56166401  | 56186082  | U2AF2                              |
| 20 | 35518176  | 35580111  | SAMHD1                             |
| 21 | 36160098  | 36421595  | RUNX1 - critical region for iAMP21 |
| 22 | 22380474  | 23265085  | IGL locus                          |
| 22 | 22599087  | 22599927  | VPREB1                             |
| 22 | 23522696  | 23660224  | BCR                                |
| 22 | 23630360  | 23637210  | M-bcr breakpoint region            |
| 22 | 23524427  | 23595985  | m-bcr breakpoint region            |
| 22 | 23613780  | 23615267  | v-bcr breakpoint region            |
| 22 | 23654024  | 23655073  | my-bcr breakpoint region           |
| 22 | 41488596  | 41576081  | EP300                              |

|   |           |           |            |
|---|-----------|-----------|------------|
| X | 100604438 | 100645784 | BTK        |
| X | 1314869   | 1331542   | CRLF2 on X |
| X | 44732434  | 44972024  | KDM6A/UTX  |
| X | 1581474   | 1656078   | P2RY8 on X |
| X | 133507342 | 133562820 | PHF6       |
| Y | 1264869   | 1281542   | CRLF2 on Y |
| Y | 1531474   | 1606078   | P2RY8 on Y |
